# Supplementary material for: Efficient solution-processed orange-red organic light-emitting diodes based on a novel thermally activated delayed fluorescence emitter
Source: Royal Society of Chemistry journal article supplement (doi:10.1039/c8tc02179a), 2018-01-01

## **ELECTRONIC SUPPLEMENTARY INFORMATION (ESI)**

---

### Electronic Supplementary Information for

#### **Efficient solution-processed orange-red organic light emitting diode based on a novel thermally activated delayed fluorescence emitter**

Xing Li,<sup>a</sup> Kai Wang,<sup>\*a</sup> Yi-Zhong Shi,<sup>a</sup> Ming Zhang,<sup>b</sup> Gao-Le Dai,<sup>a</sup> Wei Liu,<sup>a</sup> Cai-Jun Zheng,<sup>\*b</sup> Xue-Mei Ou<sup>a</sup> and  
Xiao-Hong Zhang<sup>\*a</sup>

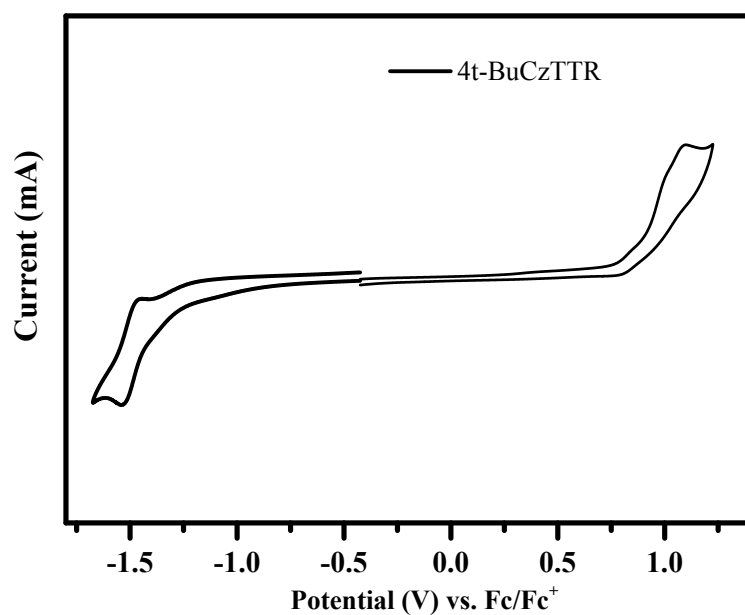

Figure S1. Cyclic voltammogram of 4t-BuCzTTR in CH<sub>3</sub>CN.

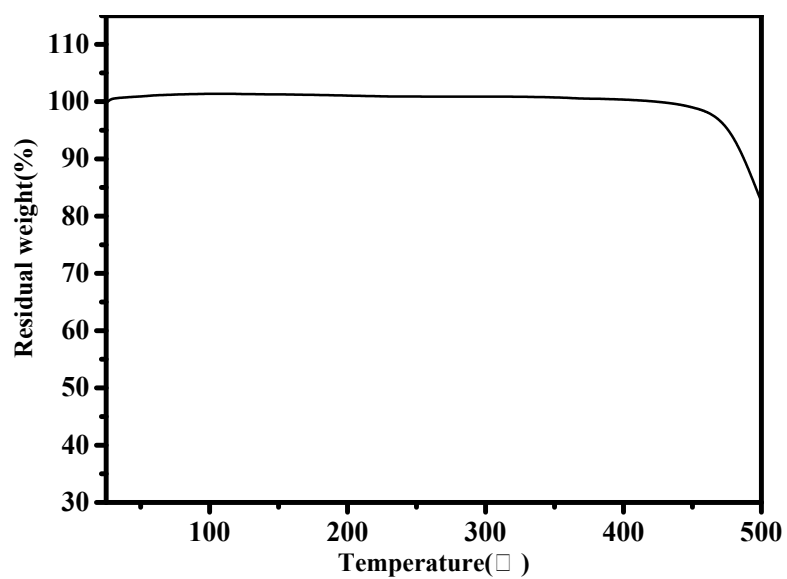

Figure S2. TGA measurement of 4t-BuCzTTR.

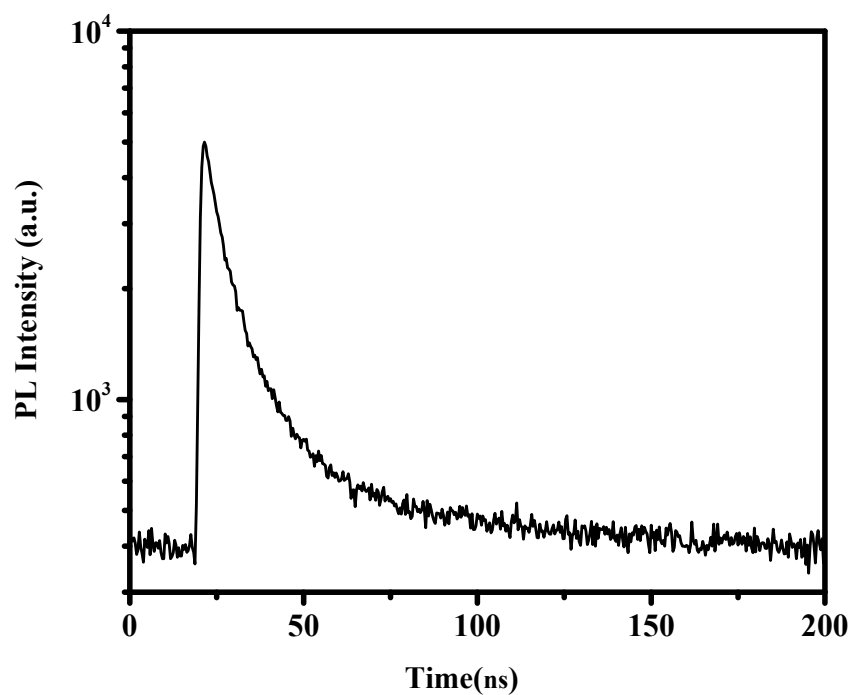

**Figure S3.** Transient PL decay curves of 10 wt% 4t-BuCzTTR doped CBP films in range of 200 ns. (Excitation wavelength was 300 nm.)

# ELECTRONIC SUPPLEMENTARY INFORMATION (ESI)

## $^1\text{H}$ and $^{13}\text{C}$ spectra of 4*t*-BuCzTTR:

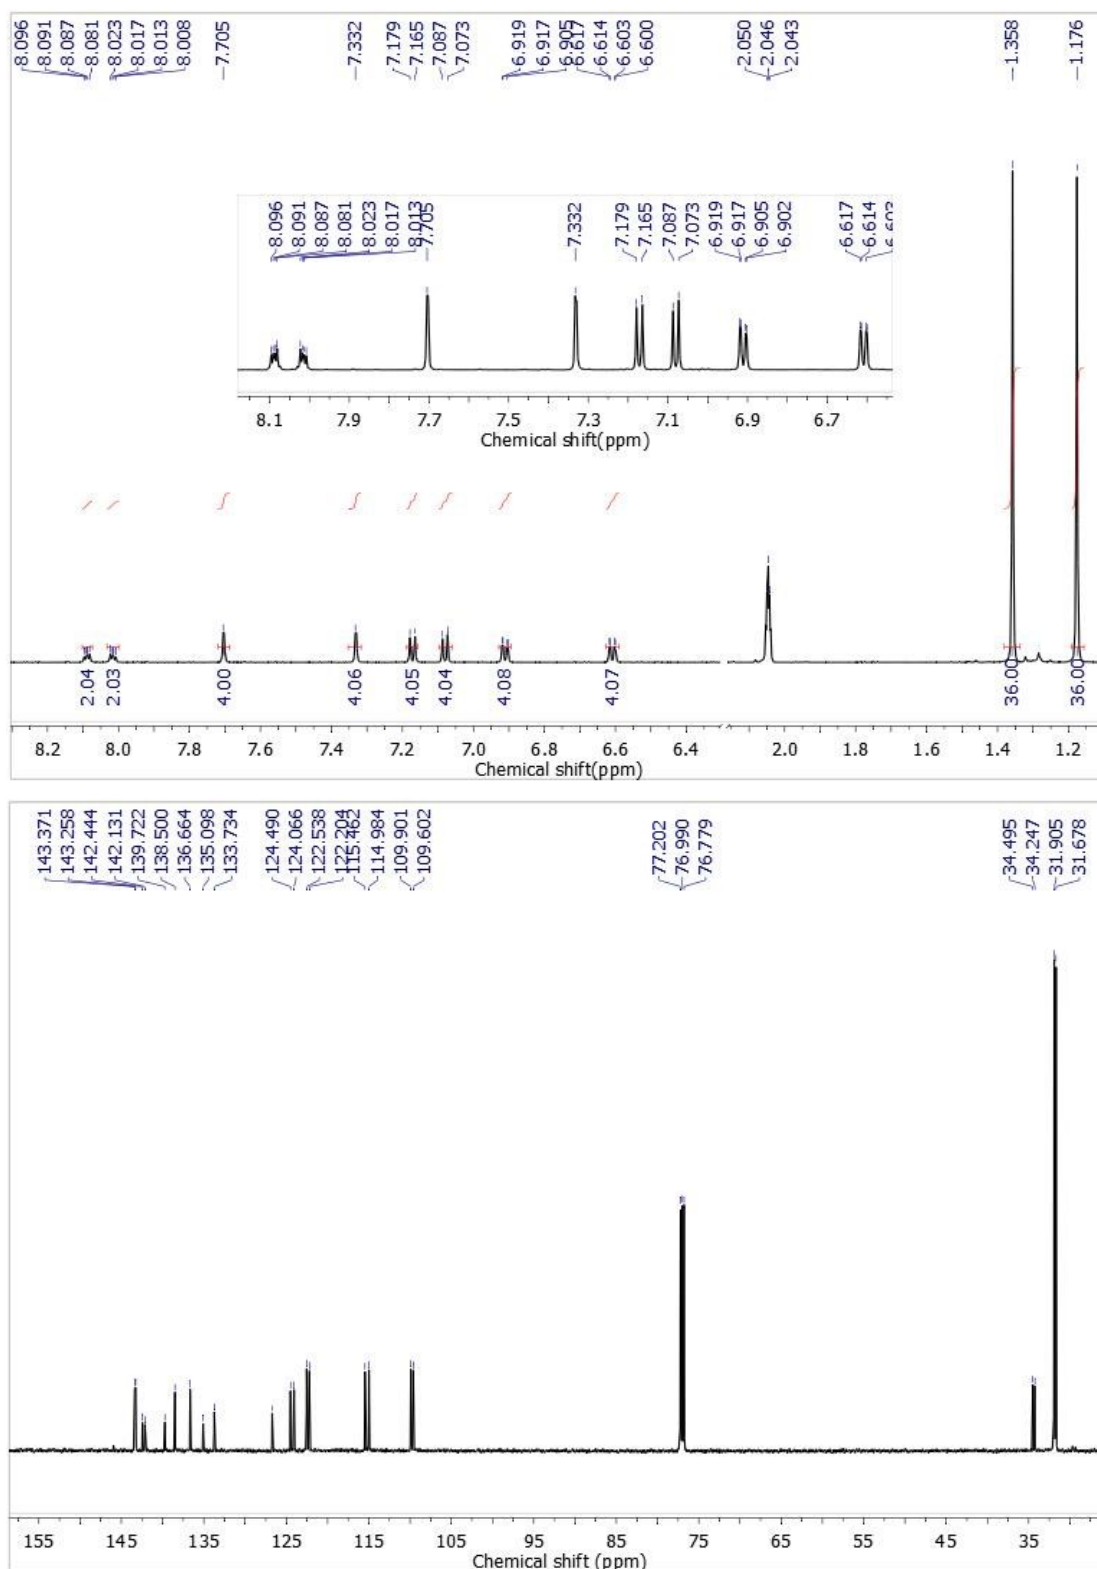

Supplement: c8tc02179a1.pdf [file c8tc02179a1.pdf]
